# Supplementary material for: Enhanced Epithelial-to-Mesenchymal Transition and Chemoresistance in Advanced Retinoblastoma Tumors Is Driven by miR-181a
Source: MDPI journal article supplement (doi:10.3390/cancers14205124), 2022-10-19
Supplement: s1 [file s1]

# Supplementary data

Figure S1

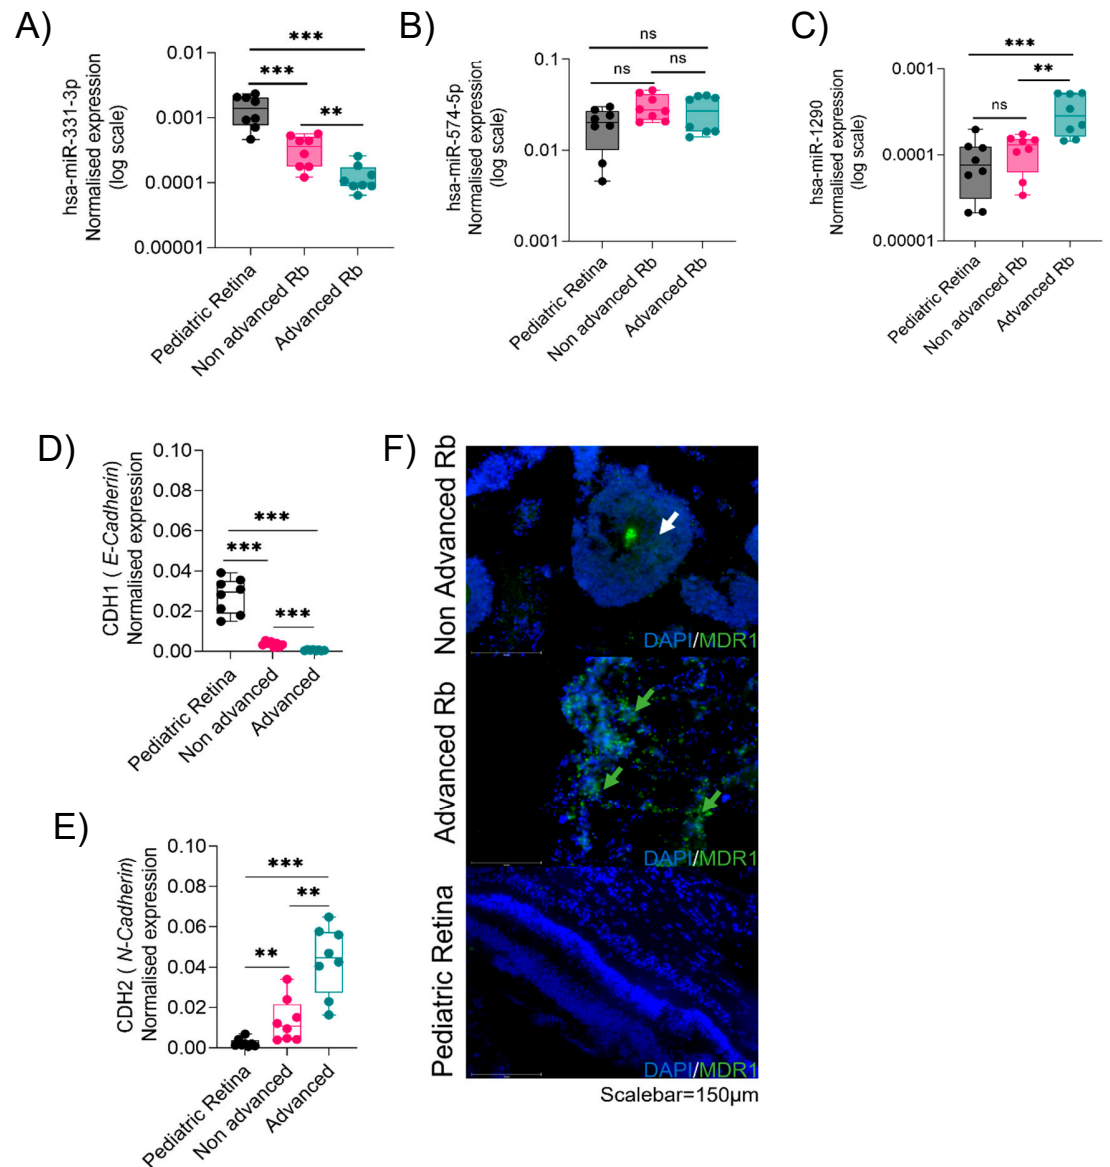

**Figure S1.** Transcriptomic profiling identifies differentially regulated miRNAs, EMT, and drug-resistant genes in Rb tumor subtypes. RT-PCR validations of microarray identified miRNAs (A) has-miR-331-3p (B) has-miR-574-5p (C) has-miR-1290 in advanced (n=4), non-advanced (n=4) and control pediatric retina (n=4). RT-PCR validations for microarray identified mRNAs (D) CDH1 and (E) CDH2 in advanced (n=4), non-advanced (n=4) and control pediatric retina (n=4) (F) Immunofluorescence showing MDR1 expression in advanced Rb (n=4), non-advanced Rb (n=4) and pediatric retina tissues (n=4). Scale bar =150μm. Values represent mean ± s.d. Two-tailed Mann-Whitney was used for statistical analysis., \*\* $P < 0.01$ , \*\*\* $P < 0.001$ . 'ns' represents no statistically significant difference between the means of two variables.

Figure S2:

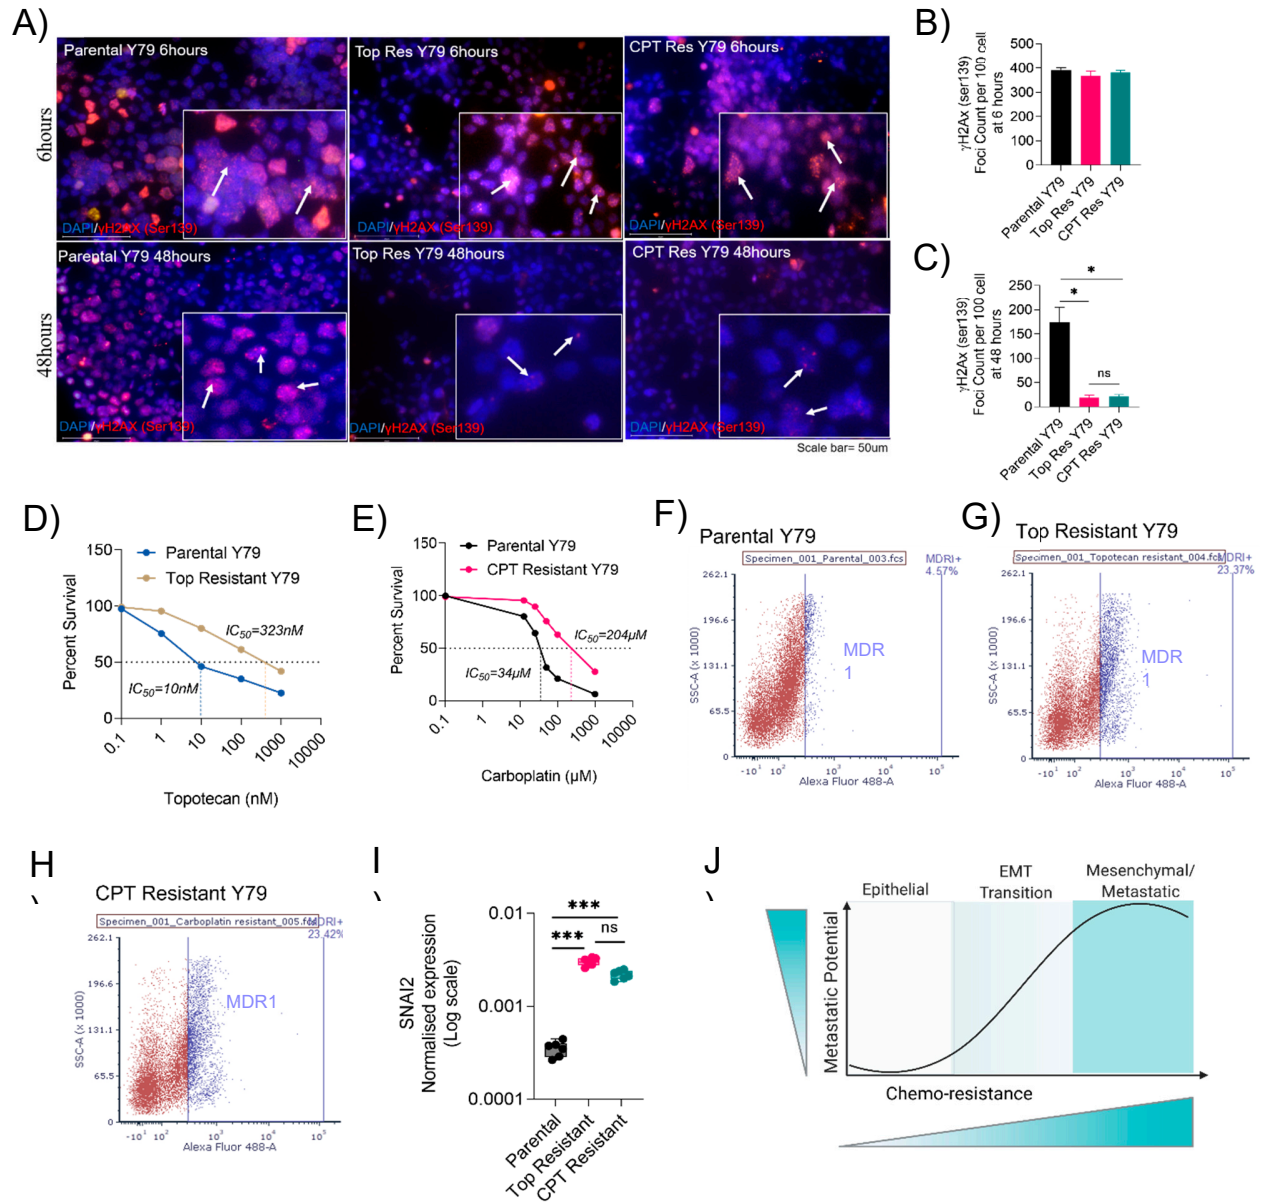

**Figure S2.** Chemotherapy-resistant Rb cells confer high EMT program and metastasis. (A) Immunofluorescence showing  $\gamma$ H2A.x foci in parental, topotecan resistant and carboplatin resistant cells upon  $IC_{50}$  dose treatment using topotecan or carboplatin for 6 hours to 48 hours.  $\gamma$ H2A.x foci count at (B) 6 hours and (C) 48 hours of topotecan and carboplatin therapy. Survival assay to determine the  $IC_{50}$  shift in resistant lines with increasing concentration of (D) topotecan (E) carboplatin. MDR1 surface staining analyzed by flow cytometry in (F) Parental Y79 cells (G) Topotecan resistant Y79 cells (H) Carboplatin

resistant Y79 cells. (I) RT-PCT results showing expression of SNAI2 in parental, topotecan resistant and carboplatin resistant cells. (J) Schematic showing EMT trans-differentiation and induction of drug resistance transit the cells to a dedifferentiated mesenchymal/ drug-resistant metastatic phenotype. Values represent mean  $\pm$  s.d. Two-tailed Mann-Whitney was used for statistical analysis. \* $P < 0.05$ , , \*\*\* $P < 0.001$ . 'ns' represents no statistically significant difference between the means of two variables.

Figure S3:

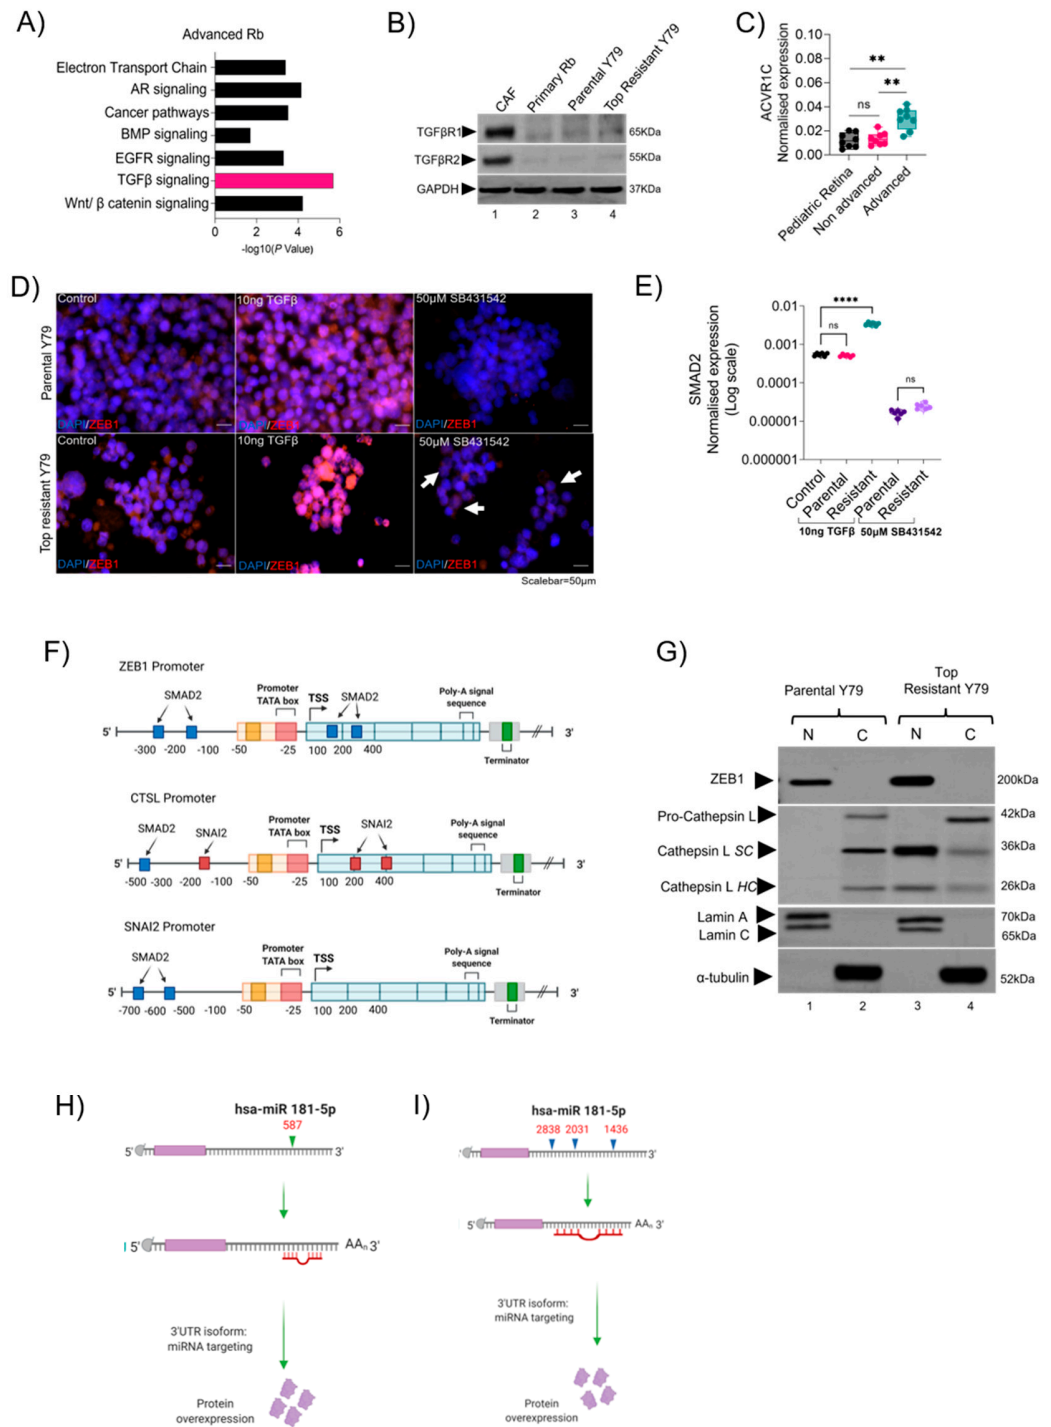

**Figure S3.** Resistant cells elicit transition through ZEB1 and resistance through Cathepsin L. (A) KEGG pathway enrichment analysis showing differentially regulated pathways in advanced Rb tumors. (B) Immunoblot showing the expression of canonical TGFβ receptors I and II in retinoblastoma associated fibroblast (CAF) primary culture, T4a stage Rb tumor primary culture,

parental Y79 and topotecan resistant Y79. (C) RT-PCR results showing normalized expression of ACVR1C receptors in pediatric retina (n=4), advanced (n=4) and non-advanced Rb tumors(n=4). (D) Immunofluorescence showing ZEB1 expression upon TGF $\beta$  induction and TGF $\beta$  inhibition in parental and topotecan resistant Y79 cells for 48hours. Scalebar=50 $\mu$ m. (E) RT-PCR showing normalized expression of SMAD2 upon TGF $\beta$  induction and TGF $\beta$  inhibition in parental and topotecan resistant Y79 cells for 48hours. (F) Schematic showing promoter binding regions of SMAD2 in ZEB1 promoter, SMAD2 and SNAI2 in CTSL promoter and SMAD2 in SNAI2 promoter. The binding sites in each promoter are curated using euakaryotic promoter database. (G) Nuclear-cytoplasmic fraction immunoblot showing the subcellular localization of ZEB1 and CTSL in parental and resistant Y79 cells. MicroRNA target prediction database (miRwalk and Targetscan) predicted binding regions of miR-181a-5p in (H) ZEB1 3'UTR (I) SNAI2 3'UTR. Values represent mean  $\pm$  S.E.M. Two-tailed Student's t-test (for 2 groups) and one-way ANOVA with Dunnett's multiple comparisons tests (for >2 group) were used for statistical analysis. \*\* $P$  < 0.01, \*\*\*\* $P$  < 0.0001. 'ns' represents no statistically significant difference between the means of two variables

Figure S4:

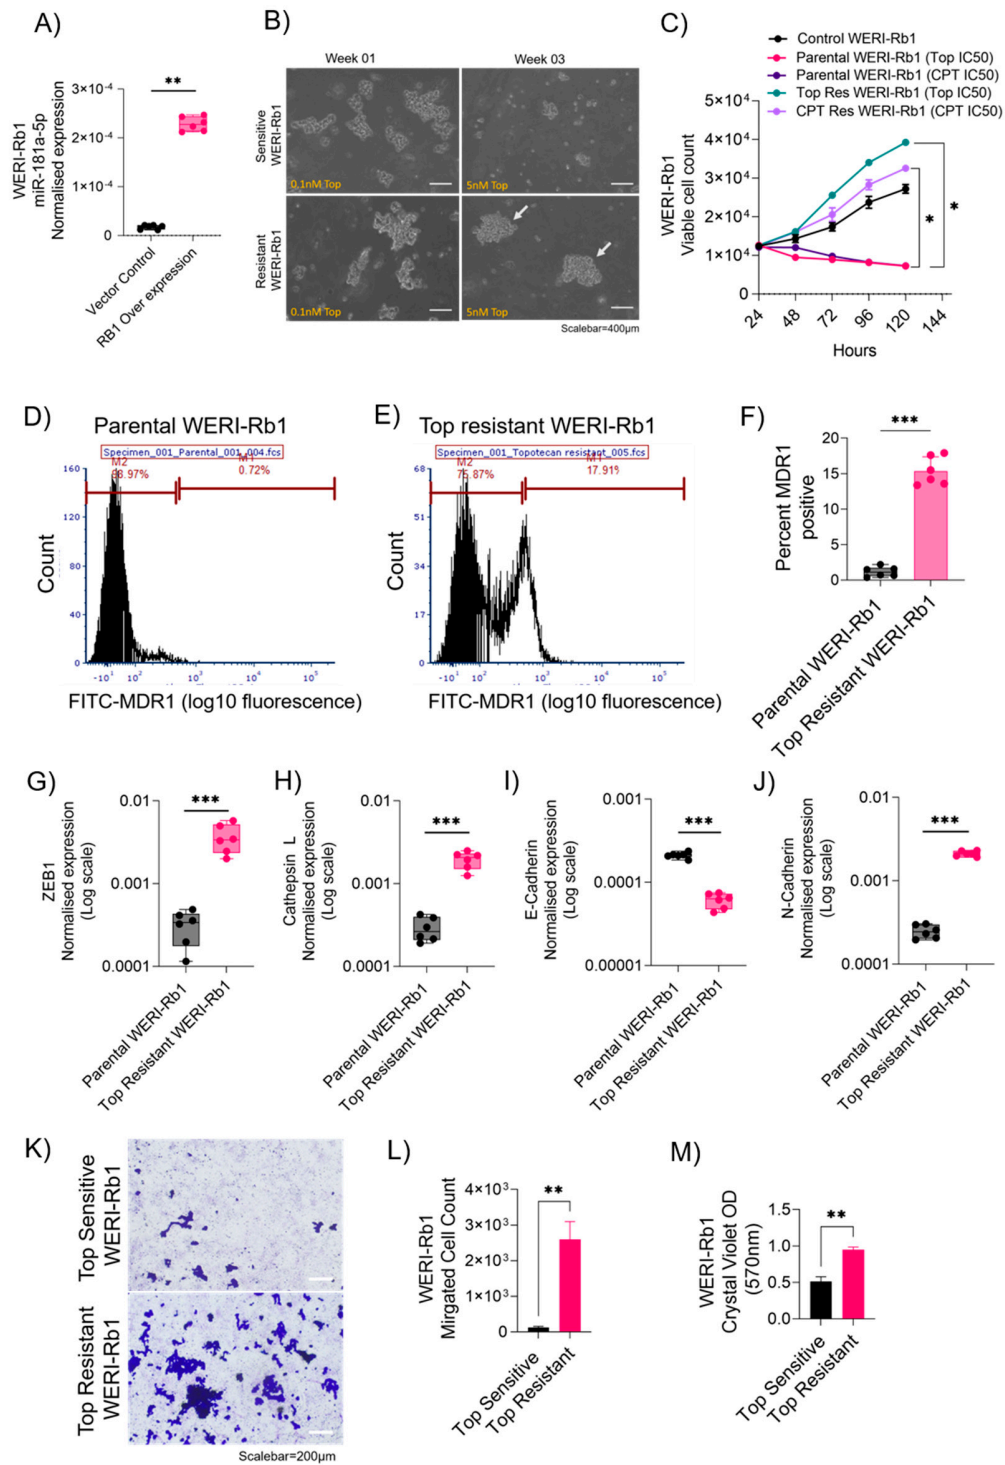

**Figure S4.** Chemotherapy-resistant WERI-Rb1 cells confer high EMT program and metastasis. (A) RT-PCR showing normalized expression of miR-181a-5p in Vector control (RB1 null) and RB1 over expressed WERI-Rb1 retinoblastoma cells. (B) Phase contrast microscopy images showing morphology of parental and resistant WERI-Rb1 cells under increasing dose of topotecan treatments from week1 to week3. Scalebar=400µm. (C) Trypan blue cell count of parental, topotecan resistant and carboplatin resistant WERI-Rb1 cells for 24hr, 48hr, 72hr and 96hr. MDR1 surface expression analysis in (D) parental and (E) topotecan resistant WERI-Rb1 cells by flow cytometry. (F) Bar graph showing the percentage of cells positive for MDR1 surface expression in parental and topotecan resistant WERI-Rb1 cells. RT-PCR showing expression of (G) ZEB1 (H) Cathepsin L (I) E-cadherin and (J) N-cadherin in parental and topotecan resistant WERI-Rb1 cells. (K) Transwell invasion and migration assay to assess the migratory capacity of resistant cells compared to sensitive cells under 10nM topotecan treatment for 48hours. (L) Crystal violet OD reading at 570nm to assess invasiveness (M) Trypan blue count to assess migrated cells in the lower compartment of the transwell chamber. Values represent mean ± S.D. Two-tailed Student's t-test (for 2 groups) and one-way ANOVA with Dunnett's multiple comparisons tests (for >2 group) were used for statistical analysis. \* $P < 0.05$ , \*\* $P < 0.01$ , \*\*\* $P < 0.001$ .



Figure S5:

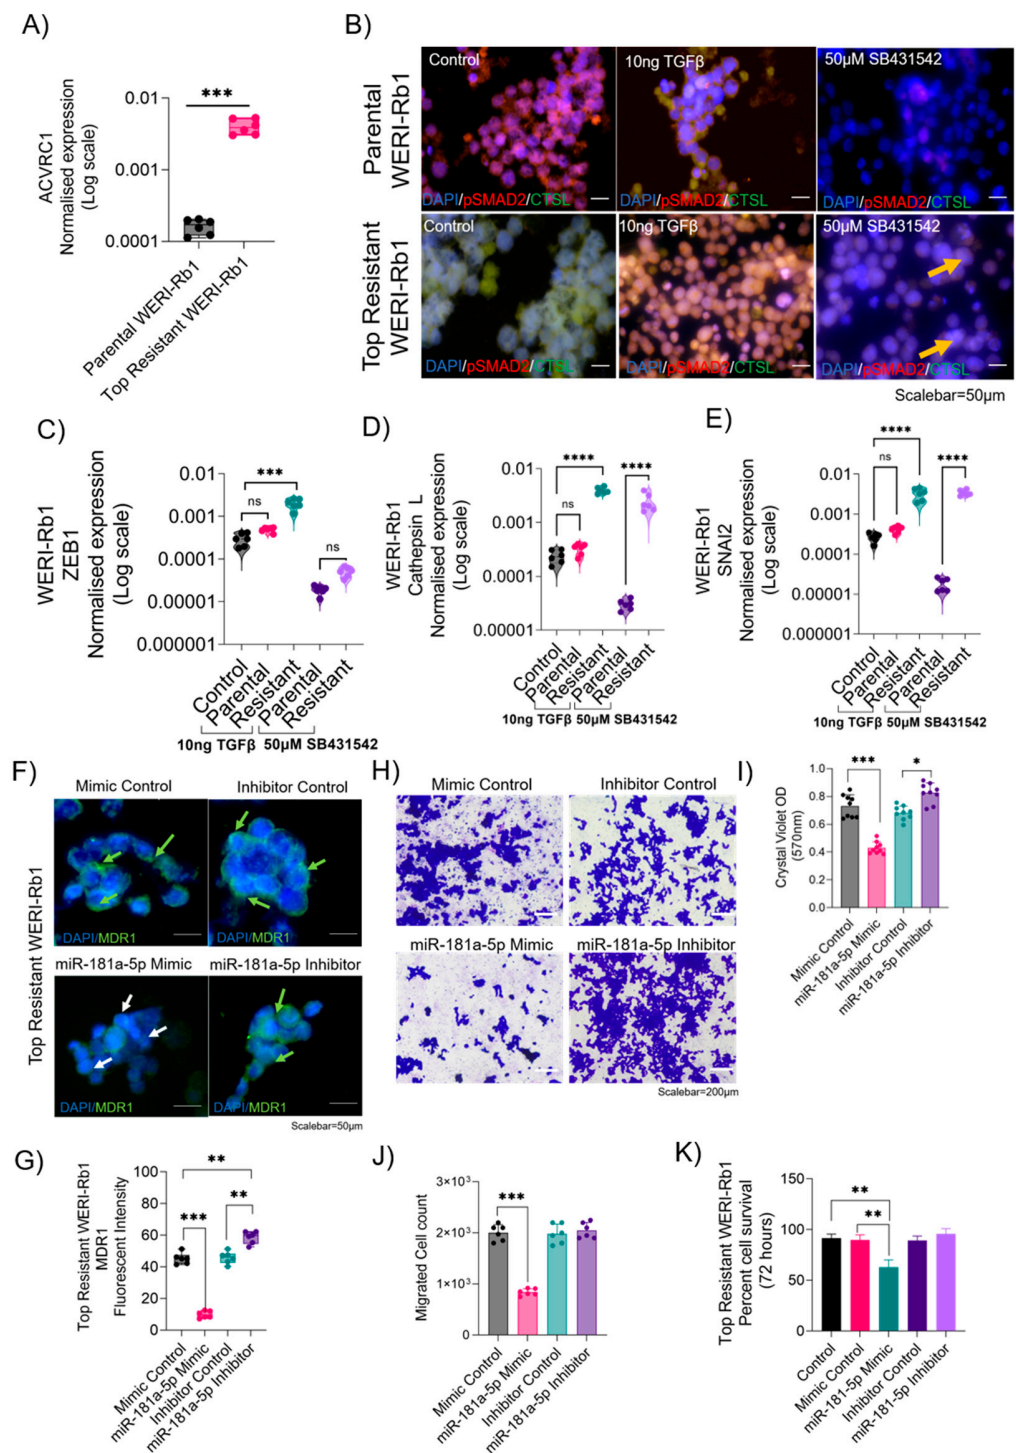

**Figure S5.** Resistant WERI-Rb1 cells elicit transition through ZEB1 and resistance through Cathepsin L and resistance depletion by miR-181a-5p confers sensitivity to chemotherapy (A) RT-



PCR results showing expression of ACVRC1 in parental, topotecan resistant and carboplatin resistant cells. (B) Immunofluorescence showing expression of phospho-SMAD2 and cathepsin L (CTSL) upon TGF $\beta$  induction (10ng for 48 hours) and TGF $\beta$  inhibition (50 $\mu$ M SB431542 for 48 hours) in parental and topotecan resistant WERI-Rb1 cells. Scalebar=50 $\mu$ m. RT-PCR results show normalized expression of (C) ZEB1 (D) CTSL (E) SNAI2 upon TGF $\beta$  induction and inhibition for 48hours. (F) Immunofluorescence showing MDR1 surface expression in topotecan resistant WERI-Rb1 cells upon miR-181a-5p overexpression and inhibition. Scalebar=50 $\mu$ m. (G) Bar graphs showing MDR1 fluorescent intensity in topotecan resistant WERI-Rb1 cells upon miR-181a-5p overexpression and inhibition. (H) Transwell invasion and migration assay to assess the invasive and migratory capacity of topotecan resistant cells upon miR-181a-5p overexpression and inhibition (I) Crystal violet OD measurement at 570nm to assess the invasiveness of resistant WERI-Rb1 cells. (J) Trypan blue cell count shows migrated cells in the lower compartment of the transwell chamber. (K) Chemosensitivity of miR-181a-5p modulated topotecan resistant WERI-Rb1 cells upon 10nM topotecan treatment for 72 hours. Values represent mean  $\pm$  S.D. Two-tailed Student's t-test (for 2 groups) and one-way ANOVA with Dunnett's multiple comparisons tests (for >2 groups) were used for statistical analysis. \* $P$  < 0.05, \*\* $P$  < 0.01, \*\*\* $P$  < 0.001, \*\*\*\* $P$  < 0.0001. 'ns' represents no statistically significant difference between the means of two variables.

Figure S6: Statistical decision tree

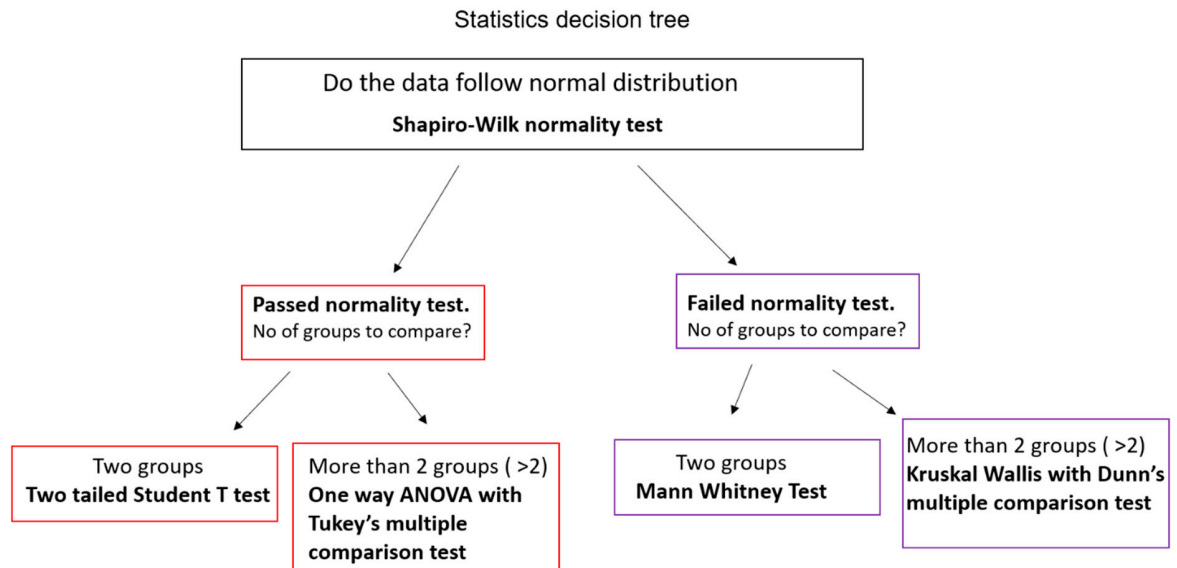

Figure S7: Uncropped blots of Figure 5A

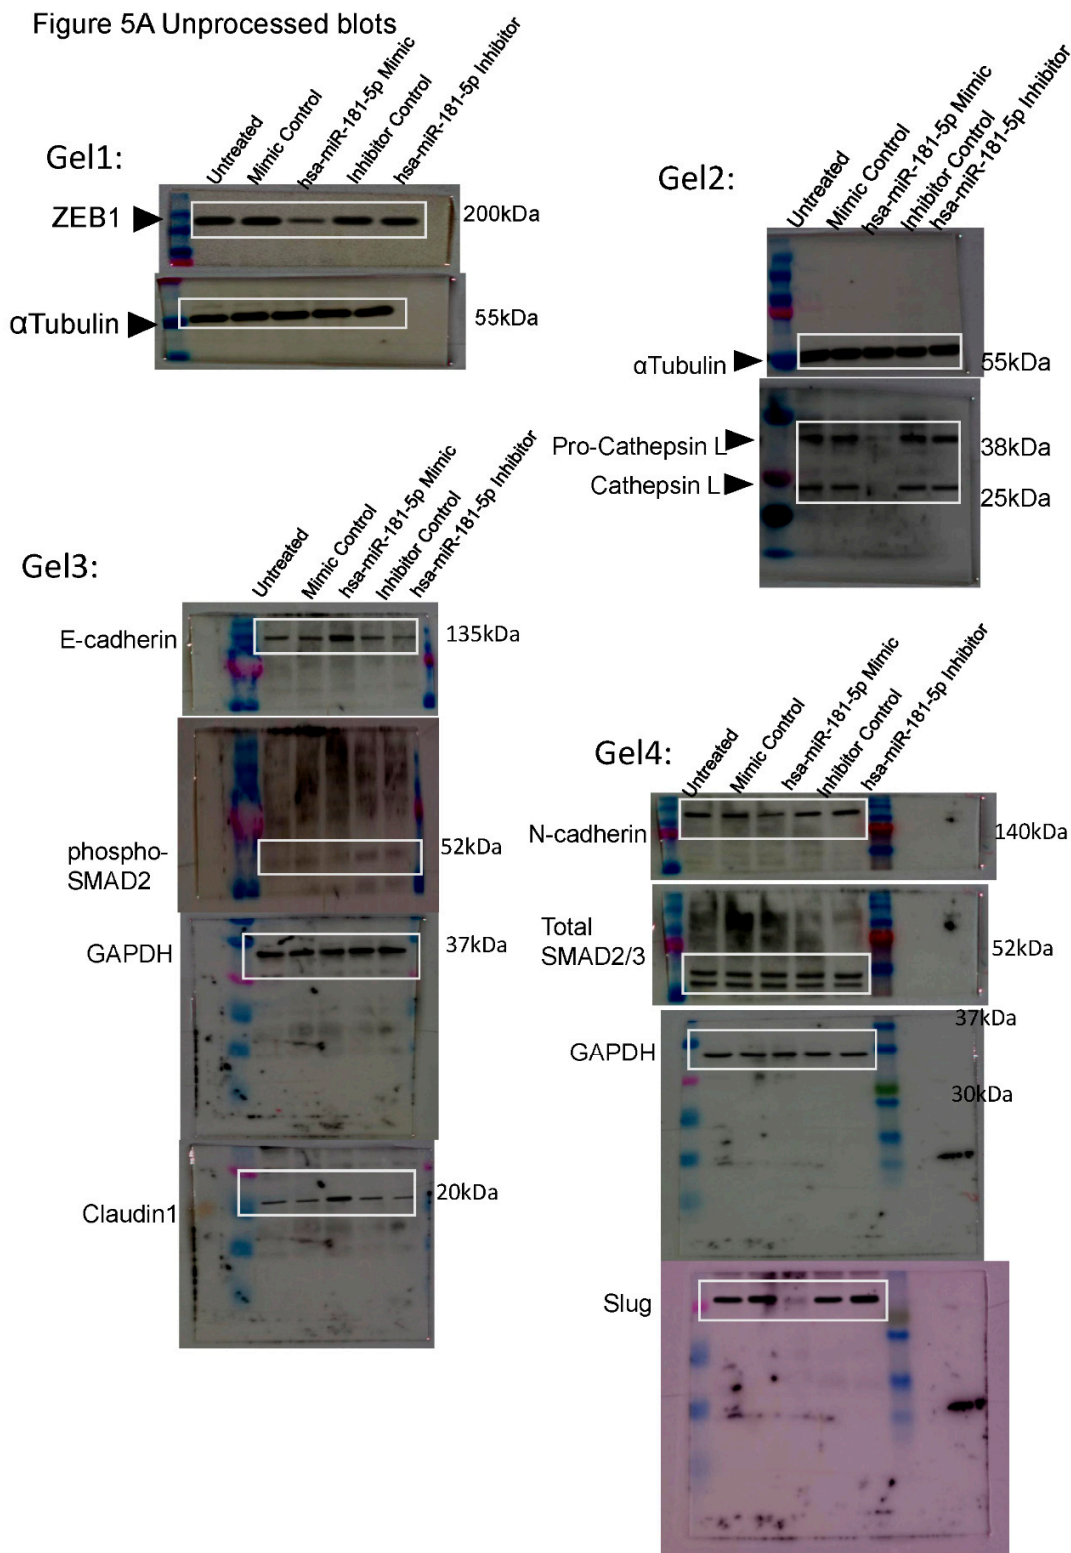

Figure S8: Uncropped immunoblots of Figure 4A

Figure 4A Unprocessed blots

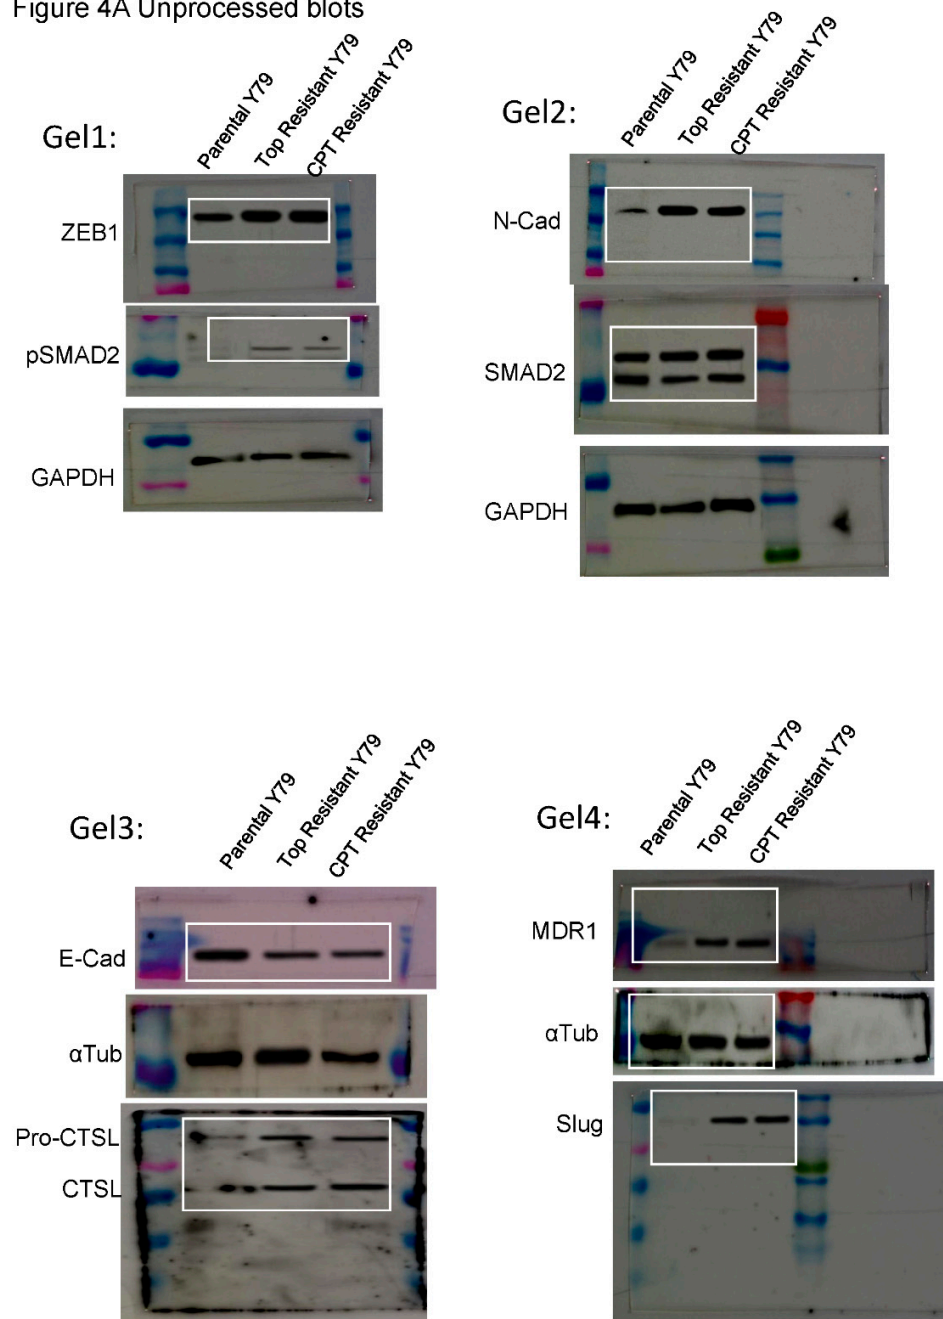

Figure S9: Uncropped immunoblots of Figure 4E

Figure 4E Unprocessed blots

Gel1:

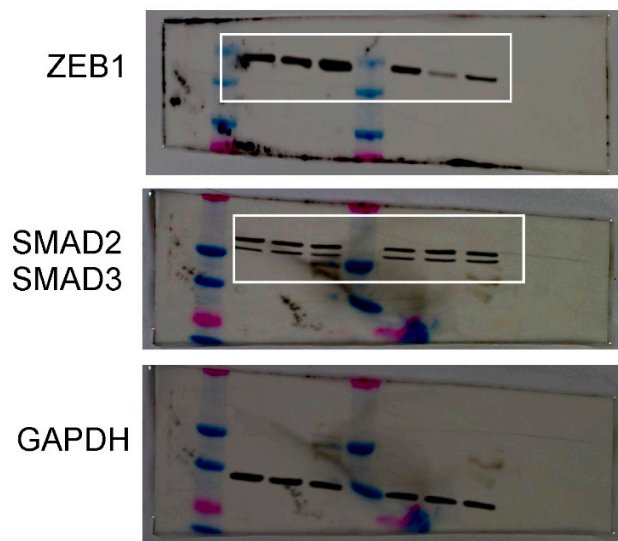

Gel1:

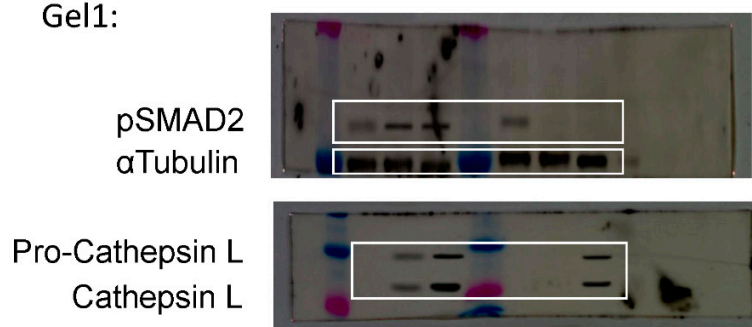

Table S1: Clinical and histopathological details of samples used for RT-PCR validations

| <b>ID</b> | <b>Sex</b> | <b>Age at presentation</b> | <b>Laterality</b> | <b>Clinical Risk</b>                                    | <b>IIRC Group</b> | <b>AJCC staging</b> |
|-----------|------------|----------------------------|-------------------|---------------------------------------------------------|-------------------|---------------------|
| P10       | F          | 23 months                  | Bilateral         | Advanced                                                | Group E           | cT3b                |
| P11       | F          | 24month                    | Unilateral        | Advanced                                                | Group E           | cT3b                |
| P12       | M          | 36 months                  | Bilateral         | Advanced                                                | Group E           | cT3b                |
| P13       | F          | 33 months                  | Unilateral        | Advanced                                                | Group E           | cT3a                |
| P14       | M          | 7 months                   | Bilateral         | Non-advanced                                            | Group D           | cT2a                |
| P15       | M          | 30 months                  | Bilateral         | Non-advanced                                            | Group D           | cT2b                |
| P16       | F          | 14months                   | Unilateral        | Non-advanced                                            | GroupD            | cT2b                |
| P17       | M          | 11 months                  | Unilateral        | Non-advanced                                            | Group D           | cT2b                |
| C1        | M          | 2 months                   |                   | Multiple organ dysfunction<br>(No ocular complications) |                   |                     |
| C2        | F          | 12 months                  |                   | No ocular complications                                 |                   |                     |
| C3        | M          | 3 months                   |                   | No ocular complications                                 |                   |                     |
| C4        | M          | 6 months                   |                   | No ocular complications                                 |                   |                     |

Table S2: Clinical and histopathological details of additional Rb samples used for immunohistochemistry validations

| <b>ID</b> | <b>Sex</b> | <b>Age at presentation</b> | <b>Laterality</b> | <b>Clinical Risk</b>                                 | <b>IIRC Group</b> | <b>AJCC staging</b> |
|-----------|------------|----------------------------|-------------------|------------------------------------------------------|-------------------|---------------------|
| P10       | F          | 23 months                  | Bilateral         | Advanced                                             | Group E           | cT3b                |
| P11       | F          | 24month                    | Unilateral        | Advanced                                             | Group E           | cT3b                |
| P12       | M          | 36 months                  | Bilateral         | Advanced                                             | Group E           | cT3b                |
| P13       | F          | 33 months                  | Unilateral        | Advanced                                             | Group E           | cT3a                |
| P14       | M          | 36 months                  | Unilateral        | Advanced                                             | Group E           | cT3b                |
| P15       | M          | 48 months                  | Unilateral        | Advanced                                             | Group E           | cT3b                |
| P16       | F          | 33 months                  | Unilateral        | Non-advanced                                         | Group D           | cT2b                |
| P17       | F          | 14 months                  | Bilateral         | Non-advanced                                         | Group D           | cT2b                |
| P18       | M          | 11 months                  | Unilateral        | Advanced                                             | Group E           | cT3b                |
| P19       | M          | 3 months                   | Unilateral        | Advanced                                             | Group E           | cT3b                |
| P20       | M          | 33 months                  | Unilateral        | Advanced                                             | Group E           | cT3a                |
| P21       | F          | 45months                   | Bilateral         | Advanced                                             | Group E           | cT3b                |
| P22       | M          | 7 months                   | Bilateral         | Non-advanced                                         | Group D           | cT2a                |
| P23       | M          | 30 months                  | Bilateral         | Non-advanced                                         | Group D           | cT2b                |
| P24       | F          | 14months                   | Unilateral        | Non-advanced                                         | GroupD            | cT2b                |
| P25       | M          | 11 months                  | Unilateral        | Non-advanced                                         | Group D           | cT2b                |
| P26       | M          | 25 months                  | Bilateral         | Advanced                                             | Group E           | cT3b                |
| P27       | F          | 20 months                  | Bilateral         | Advanced                                             | Group E           | cT3b                |
| P28       | F          | 24 months                  | Bilateral         | Non-advanced                                         | Group D           | cT2a                |
| P29       | F          | 36 months                  | Bilateral         | Non-advanced                                         | Group D           | cT2b                |
| P30       | M          | 18 months                  | Unilateral        | Non-advanced                                         | GroupD            | cT2b                |
| P31       | M          | 14 months                  | Unilateral        | Non-advanced                                         | Group D           | cT2a                |
| P32       | M          | 25 months                  | Unilateral        | Non-advanced                                         | Group D           | cT2a                |
| P33       | F          | 25 months                  | Bilateral         | Non-advanced                                         | Group D           | cT2b                |
| C1        | M          | 2 month                    |                   | Multiple organ dysfunction (No ocular complications) |                   |                     |
| C2        | F          | 12 month                   |                   | No ocular complications                              |                   |                     |
| C3        | M          | 3 month                    |                   | No ocular complications                              |                   |                     |
| C4        | M          | 6 month                    |                   | No ocular complications                              |                   |                     |
